# Supplementary material
Source: PubMed Central journal article supplement (PMC7055010)

## Supplementary material

**Supplementary Table S1. Information about age and gender from the healthy donors involved in the dose-response and sequencing analysis experiments.**<sup>1</sup> Donor 4 and Donor 10 are the same donor; <sup>2</sup> Donor 9 and Donor 11 are also the same donor.

|                     | Gender                | Age range |       |
|---------------------|-----------------------|-----------|-------|
| Sequencing analysis | Donor 1               | F         | 35-44 |
|                     | Donor 2               | F         | 45-54 |
|                     | Donor 3               | M         | 35-44 |
|                     | Donor 4 <sup>1</sup>  | F         | 35-44 |
|                     | Donor 5               | M         | 45-54 |
|                     | Donor 6               | F         | 45-54 |
|                     | Donor 7               | F         | >54   |
|                     | Donor 8               | M         | 25-34 |
|                     | Donor 9 <sup>2</sup>  | M         | 25-34 |
| Dose-response       | Gender                | Age range |       |
|                     | Donor 10 <sup>1</sup> | F         | 35-44 |
|                     | Donor 11 <sup>2</sup> | M         | 25-34 |
|                     | Donor 12              | M         | >54   |
|                     | Donor 13              | M         | <25   |
|                     | Donor 14              | M         | 45-54 |
|                     | Donor 15              | F         | >54   |
|                     | Donor 16              | M         | 45-54 |

**Supplementary Table S2. Primer sequences used for qPCR analysis.**

| <b>Gene</b>     |       | <b>Primers and probes sequences</b> |
|-----------------|-------|-------------------------------------|
| <b>FDXR</b>     | F     | GTACAACGGGCTTCCTGAGA                |
|                 | R     | CTCAGGTGGGTCAGTAGGA                 |
|                 | probe | CGGGCCACGTCCAGAGCCA                 |
| <b>APOBEC3H</b> | F     | AGTCTGCTAAGGAAGCTGTG                |
|                 | R     | GCGGCGCTTGTGTAAA                    |
|                 | probe | AGCACAGATCAGAAACACGATGGCT           |
| <b>GADD45</b>   | F     | CTGCGAGAACGACATCAAC                 |
|                 | R     | AGCGTCGGTCTCCAAGAG                  |
|                 | probe | ATCCTGCGCGTCAGCAACCCG               |
| <b>DDB2</b>     | F     | GTCACTTCCAGCACCTCACA                |
|                 | R     | ACGTCGATCGTCCTCAATTC                |
|                 | probe | AGCCTGGCATCCTCGTACAACC              |
| <b>HPRT1</b>    | F     | TCAGGCAGTATAATCCAAGATGGT            |
|                 | R     | CGCAAGCTTGCTGGTAAAAGGACCC           |
|                 | probe | AGTCTGGCTTATATCCAACACTTCG           |

**Supplementary Table S3. Differentially Expressed Genes identified by nanopore sequencing in response to radiation in order of significance (by p-value).** The average of counts, the standard deviation (SD), coefficient of variation (CV), p-values and FDR values per gene are presented in the following table (counts normalized to HPRT1).

| Gene symbol       | Ensembl ID      | Control<br>Counts normalized | SD      | CV    | Irradiated<br>Counts normalized | SD     | CV    | PValue   | FDR    |
|-------------------|-----------------|------------------------------|---------|-------|---------------------------------|--------|-------|----------|--------|
| APOBEC3H          | ENSG00000100298 | 0.5713                       | 0.1698  | 29.7  | 11.9763                         | 3.7839 | 31.6  | 7.97E-09 | 0.0002 |
| FDXR              | ENSG00000161513 | 0.0582                       | 0.0179  | 30.8  | 1.1557                          | 0.0976 | 8.4   | 1.55E-08 | 0.0002 |
| DDB2              | ENSG00000134574 | 1.9009                       | 0.4949  | 26.0  | 17.8732                         | 1.4386 | 8.0   | 5.27E-08 | 0.0005 |
| CTSO              | ENSG00000256043 | 0.3071                       | 0.1767  | 57.5  | 0                               | 0      | /     | 1.78E-07 | 0.0007 |
| BBC3              | ENSG00000105327 | 0.0627                       | 0.0148  | 23.6  | 0.8966                          | 0.1244 | 13.9  | 1.91E-07 | 0.0007 |
| ZMAT3             | ENSG00000172667 | 0.1591                       | 0.0642  | 40.4  | 1.2115                          | 0.1847 | 15.2  | 1.92E-07 | 0.0007 |
| TNFSF8            | ENSG00000106952 | 0.3561                       | 0.0257  | 7.2   | 2.2403                          | 0.4527 | 20.2  | 2.12E-07 | 0.0007 |
| AEN               | ENSG00000181026 | 0.1246                       | 0.0381  | 30.6  | 0.9593                          | 0.0179 | 1.9   | 2.14E-07 | 0.0007 |
| BAX               | ENSG00000087088 | 1.3447                       | 0.1753  | 13.0  | 7.5686                          | 1.3602 | 18.0  | 3.02E-07 | 0.0008 |
| LINC00475         | ENSG00000225511 | 0.0044                       | 0.0004  | 9.1   | 0.1295                          | 0.0098 | 7.6   | 3.03E-07 | 0.0008 |
| CD70              | ENSG00000125726 | 0.2257                       | 0.0512  | 22.7  | 1.2826                          | 0.5122 | 39.9  | 4.49E-07 | 0.0010 |
| MAMDC4            | ENSG00000177943 | 0.0517                       | 0.0159  | 30.8  | 0.3759                          | 0.0694 | 18.5  | 5.65E-07 | 0.0012 |
| TNFSF4            | ENSG00000117586 | 0.0245                       | 0.0098  | 40.0  | 0.2341                          | 0.045  | 19.2  | 8.26E-07 | 0.0016 |
| CMBL              | ENSG00000164237 | 0.011                        | 0.0033  | 30.0  | 0.1447                          | 0.0137 | 9.5   | 1.11E-06 | 0.0020 |
| MDM2              | ENSG00000135679 | 1.7591                       | 0.3494  | 19.9  | 7.7644                          | 0.3704 | 4.8   | 1.37E-06 | 0.0023 |
| GADD45A           | ENSG00000116717 | 0.1809                       | 0.0264  | 14.6  | 1.2992                          | 0.2018 | 15.5  | 1.62E-06 | 0.0025 |
| TNFRSF10B         | ENSG00000120889 | 0.4385                       | 0.1518  | 34.6  | 2.1418                          | 0.0667 | 3.1   | 1.65E-06 | 0.0025 |
| PCNA              | ENSG00000132646 | 0.8785                       | 0.0612  | 7.0   | 3.5171                          | 0.7145 | 20.3  | 1.90E-06 | 0.0027 |
| HSD17B8           | ENSG00000204228 | 0.0843                       | 0.0546  | 64.8  | 0                               | 0      | /     | 2.19E-06 | 0.0029 |
| EDA2R             | ENSG00000131080 | 0.0033                       | 0.0026  | 78.8  | 0.1243                          | 0.0138 | 11.1  | 2.28E-06 | 0.0029 |
| ACTA2             | ENSG00000107796 | 0.1462                       | 0.0244  | 16.7  | 0.6099                          | 0.0856 | 14.0  | 3.31E-06 | 0.0038 |
| RPS27L            | ENSG00000185088 | 10.0617                      | 0.1892  | 1.9   | 41.552                          | 5.4299 | 13.1  | 3.36E-06 | 0.0038 |
| CCNG1             | ENSG00000113328 | 0.7126                       | 0.1661  | 23.3  | 2.8706                          | 0.3665 | 12.8  | 3.43E-06 | 0.0038 |
| IGLV1-44          | ENSG00000211651 | 0.0776                       | 0.084   | 108.2 | 0                               | 0      | /     | 6.23E-06 | 0.0067 |
| TMEM30A           | ENSG00000112697 | 0.7525                       | 0.025   | 3.3   | 2.4629                          | 0.197  | 8.0   | 8.99E-06 | 0.0090 |
| TRIAP1            | ENSG00000170855 | 0.7634                       | 0.0361  | 4.7   | 2.4651                          | 0.3851 | 15.6  | 9.17E-06 | 0.0090 |
| GLS2              | ENSG00000135423 | 0.0125                       | 0.0044  | 35.2  | 0.1014                          | 0.013  | 12.8  | 1.04E-05 | 0.0097 |
| RPL23AP42         | ENSG00000234851 | 0.0646                       | 0.0579  | 89.6  | 0.5863                          | 0.4195 | 71.6  | 1.06E-05 | 0.0097 |
| POLH              | ENSG00000170734 | 0.1758                       | 0.036   | 20.5  | 0.6023                          | 0.0868 | 14.4  | 1.22E-05 | 0.0108 |
| XPC               | ENSG00000154767 | 0.8589                       | 0.225   | 26.2  | 3.1482                          | 0.5114 | 16.2  | 1.40E-05 | 0.0120 |
| PHPT1             | ENSG00000054148 | 7.9823                       | 0.7359  | 9.2   | 27.73                           | 4.1228 | 14.9  | 2.02E-05 | 0.0162 |
| VPS28             | ENSG00000160948 | 0                            | 0       | /     | 0.0663                          | 0.0881 | 132.9 | 2.12E-05 | 0.0165 |
| LIF               | ENSG00000128342 | 0.0165                       | 0.0065  | 39.4  | 0.0989                          | 0.0196 | 19.8  | 2.68E-05 | 0.0202 |
| SESN1             | ENSG00000080546 | 0.6781                       | 0.2311  | 34.1  | 2.628                           | 0.9636 | 36.7  | 2.99E-05 | 0.0205 |
| ASCC3             | ENSG00000112249 | 0.4081                       | 0.0462  | 11.3  | 1.1673                          | 0.0719 | 6.2   | 3.00E-05 | 0.0205 |
| Novel Pseudogene  | ENSG00000283234 | 0.0004                       | 0.0004  | 100.0 | 0.0273                          | 0.0061 | 22.3  | 3.02E-05 | 0.0205 |
| RPS19P1           | ENSG00000214612 | 0.5072                       | 0.107   | 21.1  | 1.5562                          | 0.4361 | 28.0  | 3.03E-05 | 0.0205 |
| FHL2              | ENSG00000115641 | 0.0302                       | 0.008   | 26.5  | 0.1869                          | 0.0891 | 47.7  | 3.22E-05 | 0.0212 |
| PRMT7             | ENSG00000132600 | 0.2428                       | 0.0886  | 36.5  | 0.8133                          | 0.2288 | 28.1  | 3.88E-05 | 0.0249 |
| SLC7A6            | ENSG00000103064 | 0.3607                       | 0.1445  | 40.1  | 1.2235                          | 0.0325 | 2.7   | 4.27E-05 | 0.0267 |
| VWCE              | ENSG00000167992 | 0.0047                       | 0.0013  | 27.7  | 0.0349                          | 0.0068 | 19.5  | 8.02E-05 | 0.0490 |
| PTP4A1 Pseudogene | ENSG00000278275 | 0.0827                       | 0.0222  | 26.8  | 0.262                           | 0.0168 | 6.4   | 8.39E-05 | 0.0493 |
| ZNF541            | ENSG00000118156 | 0.0325                       | 0.0262  | 80.6  | 0.1508                          | 0.0572 | 37.9  | 8.73E-05 | 0.0493 |
| PAPPA             | ENSG00000182752 | 0.0025                       | 0.0017  | 68.0  | 0.0318                          | 0.0042 | 13.2  | 8.78E-05 | 0.0493 |
| PLK2              | ENSG00000145632 | 0.0139                       | 0.00444 | 31.9  | 0.0763                          | 0.0126 | 16.5  | 8.84E-05 | 0.0493 |
| FAS               | ENSG00000026103 | 0.3315                       | 0.07829 | 23.6  | 0.8614                          | 0.1994 | 23.1  | 9.16E-05 | 0.0500 |

**Supplementary Table S4. qPCR analysis performed in the sequenced samples (Figure 3B).** The average of the fold changes and the standard deviation (SD) are included in the table. Statistical analyses were performed in log transformed data. Paired-T-test between the control and irradiated samples was applied and the p-values included in the table.

|                 | <u>Control</u>                 |           | <u>Irradiated</u>              |           | <u>p-value</u> |
|-----------------|--------------------------------|-----------|--------------------------------|-----------|----------------|
|                 | <u>Average<br/>Fold change</u> | <u>SD</u> | <u>Average<br/>Fold change</u> | <u>SD</u> |                |
| <b>FDXR</b>     | 1.30                           | 0.26      | 23.65                          | 1.98      | 0.003          |
| <b>APOBEC3H</b> | 1.20                           | 0.30      | 21.22                          | 10.4      | 0.021          |
| <b>GADD45A</b>  | 0.89                           | 0.10      | 4.90                           | 0.44      | 0.002          |
| <b>DDB2</b>     | 1.08                           | 0.17      | 7.44                           | 1.43      | 0.003          |

**Supplementary Figure S1. Linear regression analysis of the correlation between qPCR and sequencing analyses.** The logarithm of the fold changes obtained for APOBEC3H, FDXR and GADD45A by qPCR and sequencing have been presented for the 3 replicates. A linear regression is shown in the figure with a  $R^2$  value of 0.9837. Pearson's correlation coefficient is 0.992 at  $P < 0.001$ .

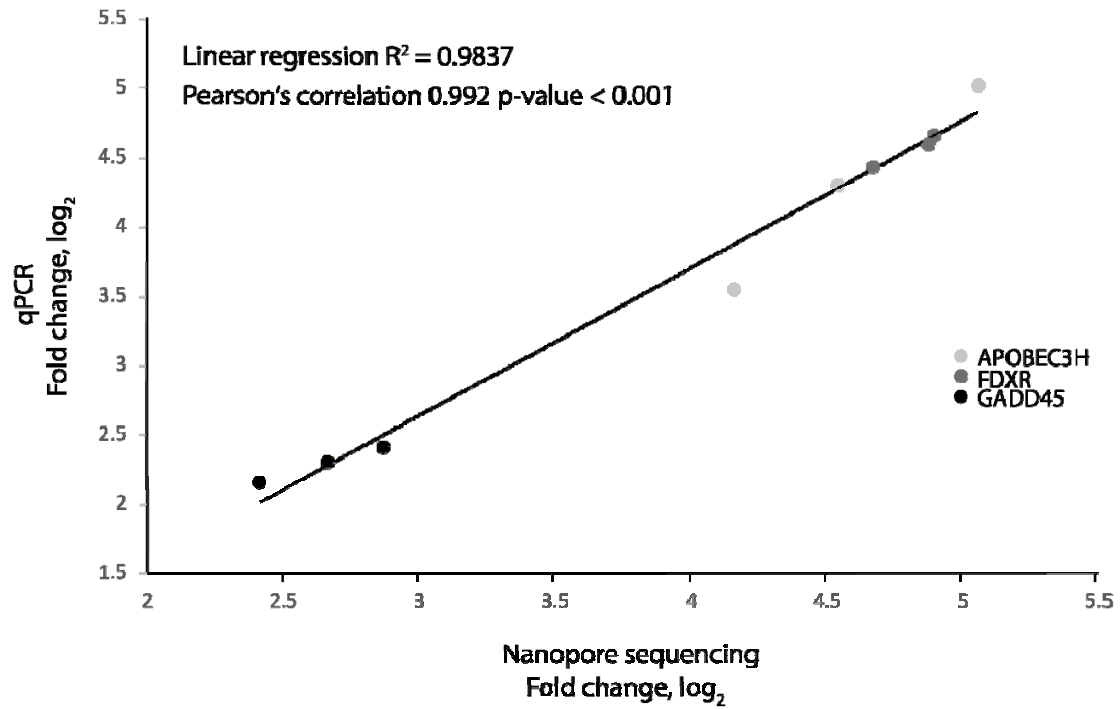

**Supplementary Figure S2. Dose-response curves adjusted by linear regression model for APOBEC3H and FDXR.** The mean expression of 7 donors (2 females and 5 males) was used to generate these dose-response curves using a linear fit. Data are shown as mean  $\pm$  standard error of the mean (S.E.M.). Pearson's correlation coefficient and p-values are shown for each gene.

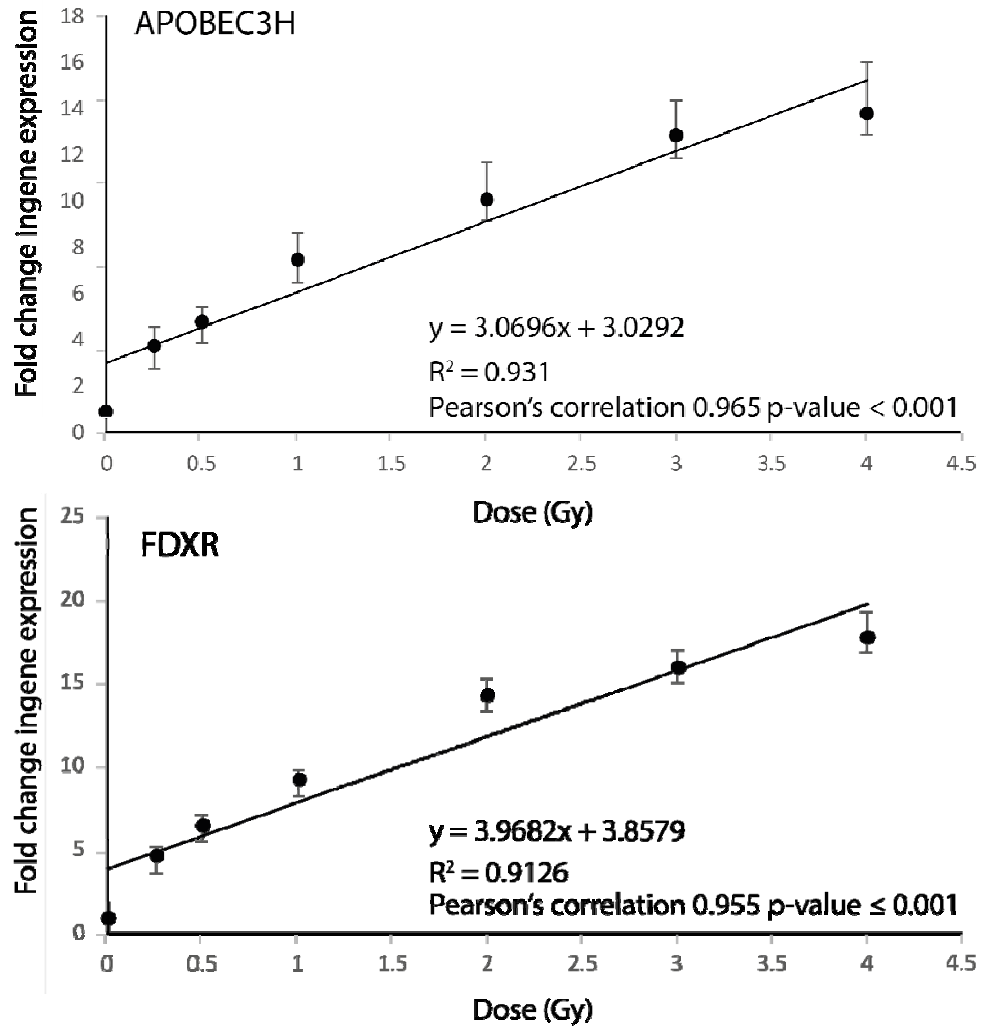

**Supplementary Figure S3. Dose-response curves adjusted by linear regression model for APOBEC3H.** The mean expression of 5 male or 2 female donors was used to generate these dose-response curves using a linear fit. Data are shown as mean  $\pm$  S.E.M. Pearson's correlation coefficient and p-values are shown for males and females.

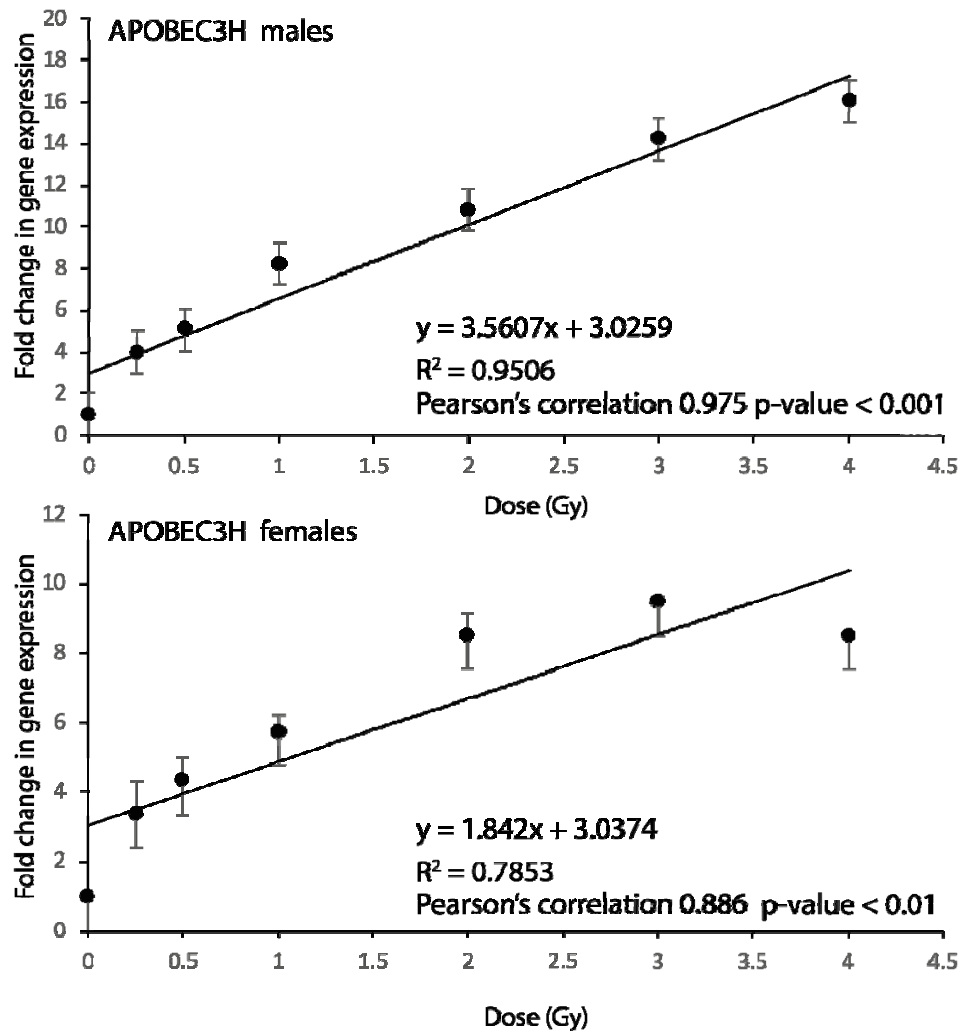

**Supplementary Figure S4. Dose-response curves adjusted by linear regression model for FDXR.** The mean expression of 5 male or 2 female donors was used to generate these dose-response curves using a linear fit. Data are shown as mean  $\pm$  S.E.M. Pearson's correlation coefficient and p-values are shown for males and females.

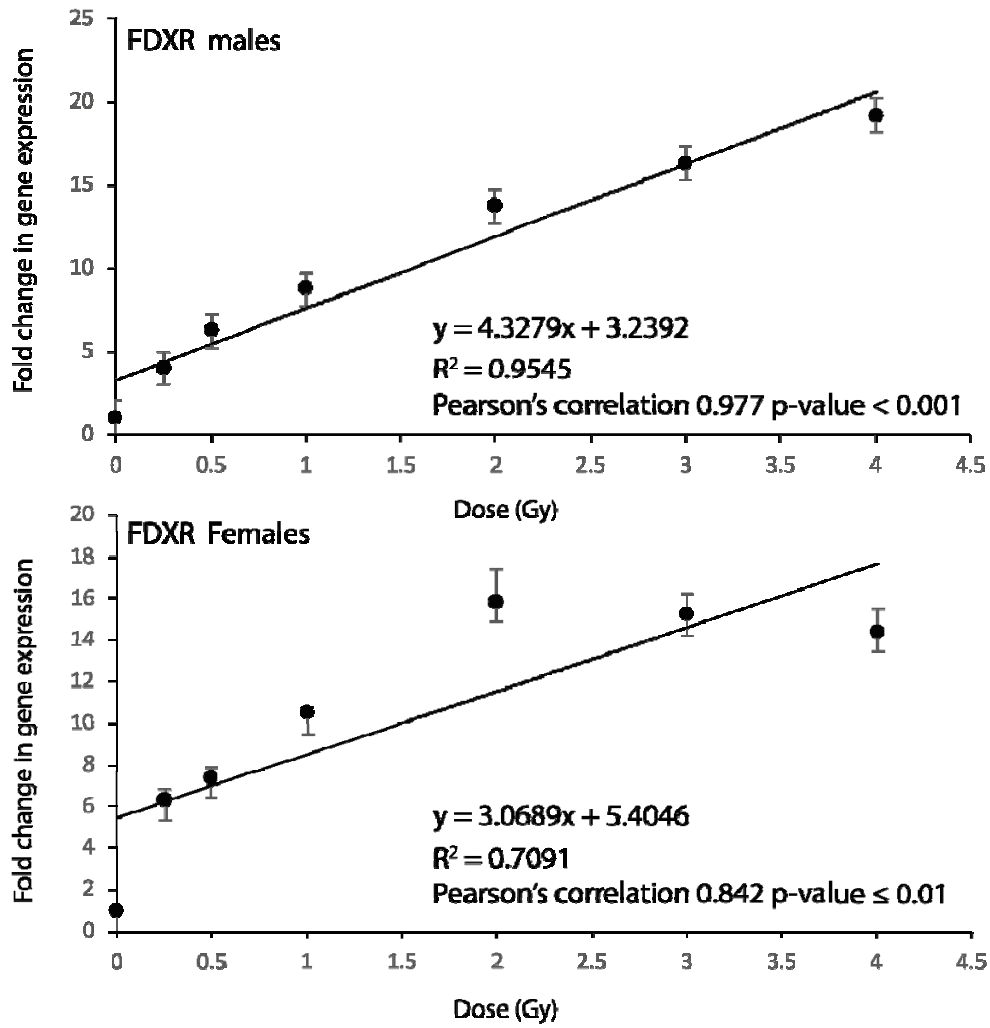

Supplement: NIHMS1563053-supplement-Supplementary_Material.pdf [file NIHMS1563053-supplement-Supplementary_Material.pdf]
